# Supplementary material
Source: Springer Nature journal article supplement (https://www.springermedizin.de/resource/supplementary/12885_2013_4018_MOESM1_ESM.pdf/9465044)
Supplement: MOESM1 [file 9465044]

**ADDITIONAL FILES**

**Supplementary Figure 1: Spatial Localization of Cohesion-Related Proteins in HDLM-2.**

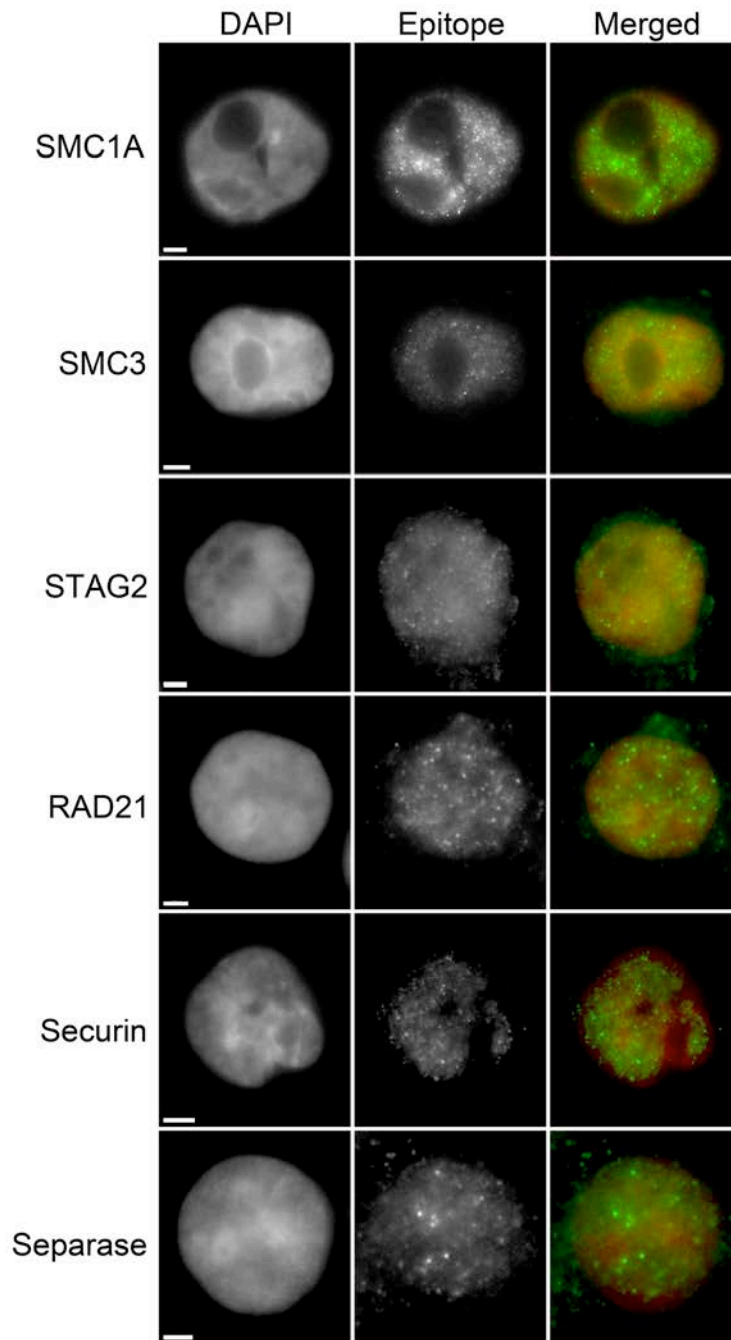

**Supplementary Figure 1: Spatial Localization of Cohesion-related Proteins in HDLM-2.**

Indirect immunofluorescence was employed to evaluate the localization of six proteins central to sister chromatid cohesion in HDLM-2. Presented are representative low-resolution images obtained from HDLM-2 cells. Nuclei were counterstained with DAPI and immunofluorescently labeled for the epitope indicated. Scale bar represents 20 $\mu$ m.

**Supplementary Figure 2: Gene Expression Data for RAD21 in Human Cancer Cell Lines.**

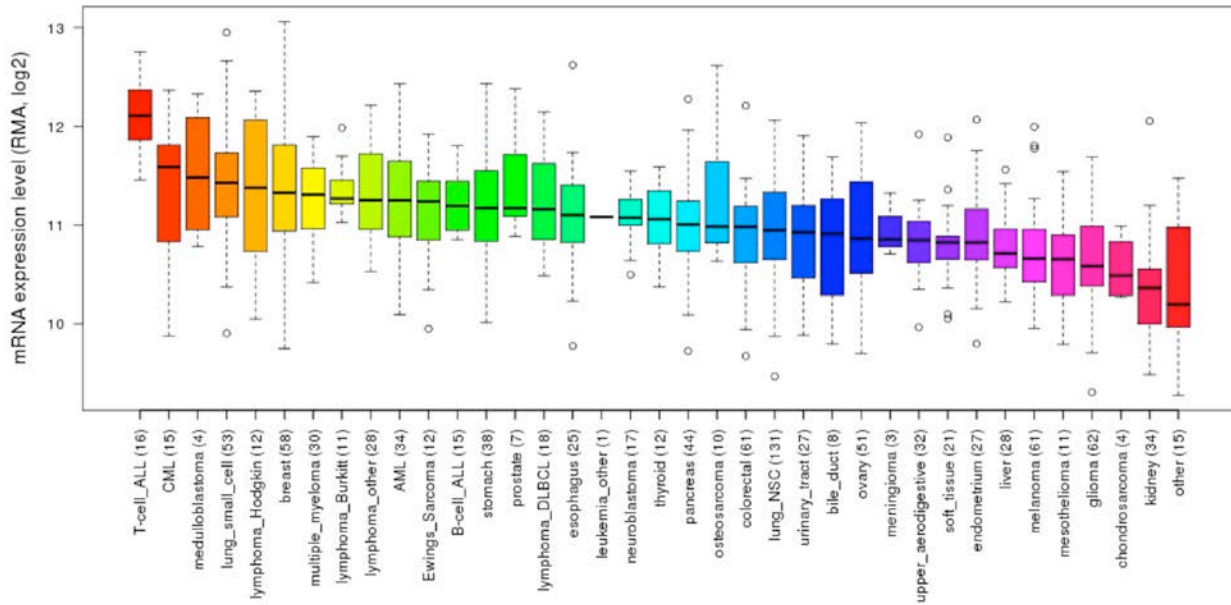

**Supplementary Figure 2: Gene Expression Data for RAD21 in Human Cancer Cell Lines.**

Graphical depiction of the publically available mRNA expression data for *RAD21* in various cancer cell lines (x-axis): numbers in brackets indicate number of cell lines evaluated within each tumor type. All data is extracted from the CCLE\_Expression\_Entrez\_2012-10-18.res :Gene-centric RMA-normalized mRNA expression data (<http://www.broadinstitute.org/ccle/home>).

**Supplementary Table 1: Antibodies Dilutions Employed in this Study.**

| <b>Epitope</b> | <b>Source</b> | <b>Cat. No.</b> | <b>IIF Dilution<sup>A</sup></b> | <b>WB Dilution<sup>B</sup></b> |
|----------------|---------------|-----------------|---------------------------------|--------------------------------|
| SMC1A          | Abcam         | ab9262          | 1:2,000                         | 1:7,500                        |
| SMC3           | Abcam         | ab9263          | 1:500                           | 1:3,000                        |
| RAD21          | Abcam         | ab16473         | 1:200                           | 1:2,000                        |
| STAG2          | Abcam         | ab4463          | 1:200                           | 1:1,000                        |
| Securin        | Abcam         | ab26273         | 1:200                           | 1:1,000                        |
| Separase       | Abcam         | ab3762          | 1:200                           | 1:1,000                        |

<sup>A</sup>Indirect Immunofluorescence (IIF)

<sup>B</sup>Western Blot (WB)
